# Supplementary material for: Biointerface topography mediates the interplay between endothelial cells and monocytes
Source: RSC Adv. 2020 Apr 6;10(23):13848–54. doi: 10.1039/d0ra00704h (PMC9051607; doi:10.1039/d0ra00704h)
Supplement: RA-010-D0RA00704H-s001 [file RA-010-D0RA00704H-s001.pdf]

## **Biointerface topography mediates the interplays between endothelial cells and monocytes**

Yan Liu <sup>a</sup>, Wenshuai Deng <sup>d</sup>, Liangliang Yang <sup>e</sup>, Xiuxiu Fu <sup>c</sup>, Zhibin Wang <sup>c</sup>, Patrick  
van Rijn <sup>\*e</sup>, Qihui Zhou <sup>\*a,b</sup>, Tao Yu <sup>\*a,c</sup>

### **Author Affiliations:**

<sup>a</sup> Institute for Translational Medicine, School of Basic Medicine, Qingdao University, Qingdao, 266021, China.

<sup>b</sup> Stomatology Center, The Affiliated Hospital of Qingdao University, Qingdao, 266003, China.

<sup>c</sup> Department of Echocardiography, The Affiliated Hospital of Qingdao University, Qingdao, 26603, China.

<sup>d</sup> Department of Neurosurgery, The Affiliated Hospital of Qingdao University, Qingdao 266003, China.

<sup>e</sup> University of Groningen, W.J. Kolff Institute for Biomedical Engineering and Materials Science, Department of Biomedical Engineering, University Medical Center Groningen, A. Deusinglaan 1, 9713 AV, Groningen, the Netherlands.

### **\*Corresponding author:**

Patrick van Rijn, Ph.D., Associate professor of Biomedical Engineering, Email: p.van.rijn@umcg.nl.

Qihui Zhou, Ph.D., Associate professor of Biomaterials, Phone: +86-17660670299, Email: qihuizhou@qdu.edu.cn.

Tao Yu, Ph.D., Associate professor of Basic Medicine, Email: yutao0112@qdu.edu.cn.

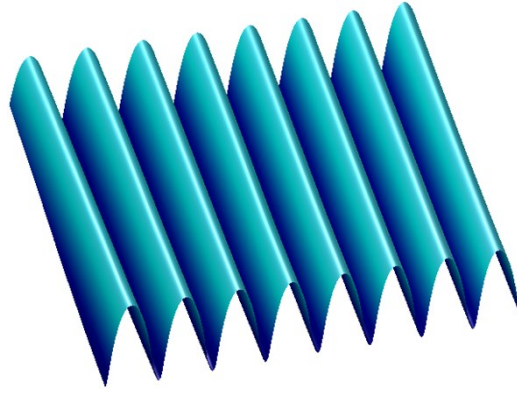

**Figure S1.** Imprinted PDMS wrinkles using the wrinkled PDMS surface as the template.
